# Supplementary material for: Association of Malnutrition and High Bleeding Risk with Long-Term Prognosis in Patients with Acute Coronary Syndrome following Percutaneous Coronary Intervention
Source: MDPI journal article supplement (doi:10.3390/medicines10120062), 2023-11-30
Supplement: s1 [file s1]

Supplementary Table S1

Baseline Characteristics before inverse probability treatment weighting analysis.

|                        | Normal or mild<br>malnutrition (n=183) | Moderate or severe<br>malnutrition (n=34) | P value |
|------------------------|----------------------------------------|-------------------------------------------|---------|
| Age, years             | 70.7 (11.0)                            | 75.6 (9.4)                                | 0.016   |
| Male                   | 80.3                                   | 73.5                                      | 0.369   |
| BMI, kg/m <sup>2</sup> | 24.2 (4.2)                             | 22.9 (4.1)                                | 0.124   |
| Hypertension           | 66.1                                   | 67.6                                      | 0.863   |
| DM                     | 39.8                                   | 61.7                                      | 0.018   |
| Dyslipidemia           | 67.7                                   | 55.8                                      | 0.18    |
| CKD                    | 29.5                                   | 58.8                                      | <0.001  |
| Smoking                | 66.6                                   | 50.0                                      | 0.063   |
| Past history of HF     | 10.3                                   | 20.5                                      | 0.144   |
| Family history of CAD  | 3.2                                    | 2.9                                       | 1       |
| Previous MI            | 16.3                                   | 29.4                                      | 0.072   |
| Previous PCI           | 26.2                                   | 32.3                                      | 0.461   |
| Previous AF/AFL        | 11.4                                   | 20.5                                      | 0.164   |
| Previous PAD           | 10.3                                   | 17.6                                      | 0.242   |
| CONU                   | 1.2                                    | 1.5                                       | <0.001  |
| J-HBR (+)              | 64.4                                   | 91.1                                      | 0.002   |
| ACS classification     |                                        |                                           |         |
| STEMI                  | 56.8                                   | 55.8                                      | 0.918   |
| NSTEMI                 | 17.4                                   | 23.5                                      | 0.404   |
| UA                     | 25.6                                   | 20.5                                      | 0.528   |
| Access site            |                                        |                                           |         |
| Radial approach        | 90.7                                   | 79.4                                      | 0.071   |
| Medications            |                                        |                                           |         |
| Aspirin                | 93.9                                   | 88.2                                      | 0.263   |
| Clopidogrel            | 22.9                                   | 44.1                                      | 0.01    |
| Prasugrel, n (%)       | 72.1                                   | 50.0                                      | 0.011   |
| ACE-inhibitor/ARBs     | 70.4                                   | 35.2                                      | <0.001  |
| β blockers             | 66.6                                   | 61.7                                      | 0.58    |
| Statin                 | 95.6                                   | 82.3                                      | 0.011   |
| Ca channel blockers    | 28.4                                   | 14.7                                      | 0.095   |
| DOAC                   | 8.7                                    | 14.7                                      | 0.339   |

|                                   |                 |                 |        |
|-----------------------------------|-----------------|-----------------|--------|
| Warfarin                          | 4.3             | 2.9             | 1      |
| Echocardiographic data            |                 |                 |        |
| LVEF, %                           | 50.3 (11.3)     | 46.2 (14.1)     | 0.127  |
| Laboratory data                   |                 |                 |        |
| White blood cell count, / $\mu$ l | 7840.9 (2887.1) | 8410.5 (3416.6) | 0.306  |
| Total lymphocyte count, / $\mu$ l | 1722.3 (731.5)  | 1121.5 (640.2)  | <0.001 |
| Triglyceride, mg/dL               | 131.1 (98.5)    | 86.7 (70.0)     | 0.013  |
| Total cholesterol, mg/dL          | 175.5 (44.9)    | 136.9 (46.2)    | <0.001 |
| HDL-C, mg/dL                      | 45.1 (12.3)     | 37.9 (13.4)     | 0.002  |
| LDL-C, mg/dL                      | 103.7 (37.8)    | 76.5 (31.1)     | <0.001 |
| Albumin, mg/dL                    | 4.0 (0.4)       | 3.0 (0.4)       | <0.001 |
| Total protein, mg/dL              | 7.1 (4.7)       | 5.8 (0.8)       | 0.135  |

---

Data are mean (standard deviation) or %. Abbreviations: BMI, body mass index; DM, diabetes mellitus; CKD, chronic kidney disease; HF, heart failure; CAD, coronary artery disease; MI, myocardial infarction; PCI, percutaneous coronary intervention; AF/AFL, atrial fibrillation/atrial flutter; PAD, peripheral artery disease; CONUT, controlling nutritional status; J-HBR, J-high bleeding risk; ACS, acute coronary syndrome; STEMI, ST elevated myocardial infarction; NSTEMI, non-ST elevation myocardial infarction; UA, unstable angina; ACE, angiotensin-converting enzyme; ARBs, angiotensin II receptor blockers; DOAC, direct oral anti-coagulants; LVEF, left ventricular ejection fraction; HDL-C, high density lipoprotein cholesterol; LDL-C, low density lipoprotein cholesterol
